# Supplementary material for: A Multi-Centric Study of Real-World Prescription Pattern of More Than Three Drugs for the Control of Hypertension Among Cardiologists
Source: Research Square preprint supplement (doi:10.21203/rs.3.rs-7550751/v1), 2025-10-03
Supplement: Supplementary file 1 [file 818cc815e895f5d6471083c7.xlsx]

## Sheet: Sheet1
Drug Class	Number of patients	Percentage of patients
Angiotensin Converting Enzyme inhibitors	3	0.01
Angiotensin Receptor blocker	369	0.88
Calcium channel blocker	359	0.85
Diuretic	345	0.82
Betablocker	359	0.85
Mineralocorticoid receptor antagonist	164	0.39
Hydralazine	107	0.25
Clonidine	8	0.02
Moxonidine	39	0.09
Sustained release prazosin	107	0.25
Minoxidil	6	0.01
