# Supplementary material for: A Multi-Centric Study of Real-World Prescription Pattern of More Than Three Drugs for the Control of Hypertension Among Cardiologists
Source: Research Square preprint supplement (doi:10.21203/rs.3.rs-7550751/v1), 2025-10-03
Supplement: Supplementary file 2 [file 90be2bd0adc6e6189f190d42.xlsx]

## Sheet: Sheet1
Variable	B	S.E.	Wald	df	P value	Odds Ratio	95% upper CI	95% lower CI
Age	-0.021	0.011	3.702	1	0.054	0.98	0.959	1
Male(1)	0.398	0.231	2.964	1	0.085	1.489	0.946	2.341
DurationofHT	0.003	0.014	0.038	1	0.845	1.003	0.976	1.03
DM(1)	0.136	0.241	0.317	1	0.573	1.145	0.715	1.836
LVH_A(1)	0.213	0.231	0.852	1	0.356	1.237	0.787	1.944
Creatinine	0.018	0.021	0.767	1	0.381	1.018	0.978	1.061
SerumPotassiumCutoff4.5	-0.565	0.254	4.951	1	0.026	0.568	0.346	0.935
Constant	1.344	0.704	3.648	1	0.056	3.836
