# Supplementary material for: A Multi-Centric Study of Real-World Prescription Pattern of More Than Three Drugs for the Control of Hypertension Among Cardiologists
Source: Research Square preprint supplement (doi:10.21203/rs.3.rs-7550751/v1), 2025-10-03
Supplement: Supplementary file 3 [file afb289020946ddbf29bacf49.xlsx]

## Sheet: Sheet1
Parameter	Metrics
Mean Age	65.18 +/-11.15 years
Male:Female ratio	00:01:00.800000
Duration of Hypertension	14.23 +/- 8.61 years
Mean Office Systolic Blood pressure	143.58 ± 16.95
Mean Office Diastolic Blood pressure	78.93 ± 12.96
Mean Office Pulse rate	78.47 ± 12.58
Smoking	9 (2%)
Asthmatic	25 (6%)
Type 2 Diabetes	270 (64%)
Hypothyroidism	65 (15%)
Hyperthyroidism	1
Underlying Ischemic Heart Disease	190 (45%)
Snoring/Obstructive sleep apnoea	64 (15%)
Left ventricular hypertrophy by echo	321 out of 407 ( 79%)
Regular physical activity	319 (76%)
Regular salt restriction	366 (87%)
Home blood pressure monitoring	282 (67%)
