# Supplementary material for: A Multi-Centric Study of Real-World Prescription Pattern of More Than Three Drugs for the Control of Hypertension Among Cardiologists
Source: Research Square preprint supplement (doi:10.21203/rs.3.rs-7550751/v1), 2025-10-03
Supplement: Supplementary file 4 [file fac65adf19f6a46f31388425.xlsx]

## Sheet: Sheet1
Study	Number of patients on ≥4 drugs	RASI*	CCB#	Diuretic	BB†	MRA‡	MRA in
							Resistant HTN¶
Alkaabi et al(7)	48	0.97	0.81	1	0.94	31% on two diuretics	39 persons
							3 on two diuretics (8%)
Shastry et al (8)	6	1	1	1	1	-	-
Tandon et al(9)	5	1	1	1	1	-	-
Dhanaraj et al(5)	37	0.97	0.92	0.81	0.65	-	-
Bulatova et al(10)*	75					Overall 14%**
Present study	420	0.89	0.85	0.82	0.85	0.39	0.27
